# Supplementary material for: Tumor hypoxia is associated with resistance to PD-1 blockade in squamous cell carcinoma of the head and neck
Source: PubMed Central journal article supplement — J Immunother Cancer. 2021 May 13;9(5):e002088. doi: 10.1136/jitc-2020-002088 (PMC8126285; doi:10.1136/jitc-2020-002088), 2021-05-13
Supplement: jitc-2020-002088supp001.pdf [file jitc-2020-002088supp001.pdf]

**Supplemental Table 1: R/M HNSCC patient characteristics.** ISH = in situ hybridization. PD-1 = Programmed cell death protein 1. Immunotherapy combinations received included: Nivolumab plus lirilumab, Nivolumab plus ipilimumab, Nivolumab plus urelumab, durvalumab plus tremelimumab.

**Supplemental Table 1. Patient Characteristics**

|                                        | N     | %  |
|----------------------------------------|-------|----|
| <b>Age</b>                             |       |    |
| Median age                             | 59    |    |
| Range                                  | 40-80 |    |
| <b>Race</b>                            |       |    |
| Caucasian                              | 32    | 89 |
| African American                       | 3     | 8  |
| Other                                  | 1     | 3  |
| <b>Gender</b>                          |       |    |
| Male                                   | 25    | 70 |
| Female                                 | 11    | 30 |
| <b>Smoking History</b>                 |       |    |
| Yes                                    | 21    | 58 |
| No                                     | 15    | 42 |
| <b>Primary Site</b>                    |       |    |
| Oropharynx                             | 10    | 28 |
| Oral Cavity                            | 15    | 42 |
| Nasopharynx                            | 2     | 5  |
| Hypopharynx                            | 2     | 5  |
| Larynx                                 | 6     | 17 |
| Parotid                                | 1     | 3  |
| <b>HPV in OPC (p16 and/or HPV ISH)</b> |       |    |
| Positive                               | 4     | 40 |
| Negative                               | 5     | 50 |
| Unknown                                | 1     | 10 |
| <b>Type of immunotherapy</b>           |       |    |
| Ant-Pd-1 mAb monotherapy               | 28    | 78 |
| Anti-PD-1 mAb + other immunotherapy    | 7     | 19 |
| Anti-PD-1 mAb + chemo (platinum/5FU)   | 1     | 3  |
| <b>Indication for immunotherapy</b>    |       |    |
| Front-line                             | 14    | 39 |
| Platinum Failure                       | 22    | 61 |

**Supplemental Table**

**2. Summary of correlation results for immune biomarkers in R/M HNSCC patients.** \* Top value is Spearman correlation coefficients, below is the p-value.

| <b>Correlations*</b>     |                 |                 |                         |                          |                 |
|--------------------------|-----------------|-----------------|-------------------------|--------------------------|-----------------|
|                          | %CAIX+          | %CAIX/int       | Average CD8/ PanCK Area | Average Treg/ PanCK Area | %PD-L1+         |
| %CAIX+                   | 1.000           | 0.840<br><0.001 | 0.117<br>0.495          | 0.330<br>0.049           | -0.241<br>0.162 |
| %CAIX/int                | 0.840<br><0.001 | 1.000           | 0.012<br>0.945          | 0.384<br>0.021           | -0.135<br>0.058 |
| Average CD8/ PanCK Area  | 0.117<br>0.495  | 0.012<br>0.945  | 1.000                   | 0.278<br>0.101           | 0.324<br>0.058  |
| Average Treg/ PanCK Area | 0.330<br>0.049  | 0.384<br>0.021  | 0.278<br>0.101          | 1.000                    | -0.019<br>0.912 |
| %PD-L1+                  | -0.241<br>0.162 | -0.135<br>0.439 | 0.324<br>0.058          | -0.019<br>0.912          | 1.000           |

**Supplemental Figure 1.** (a) Representative immunofluorescence of Foxp3, carbonic anhydrase IX (CAIX) and pan cytokeratin (PanCK) at 20X magnification of formalin-fixed paraffin-embedded (FFPE) sections from HNSCC patients treated with either pembrolizumab or nivolumab. Scale bar, 200µm (b) Tabulated results of Foxp3<sup>+</sup> T cells normalized to the PanCk<sup>+</sup> area from HNSCC patients that progressed on (P) or had disease control (DC; defined as stable disease, partial or complete response) immunotherapy. (c) Overall survival of patients treated with either pembrolizumab or nivolumab monotherapy based on Foxp3<sup>+</sup> T cells. (d) Progression free survival of patients as in c. (e) Tabulated Programmed death-ligand 1 (PD-L1) scoring of immunohistochemistry from FFPE sections of patients as in b. (f) Overall survival of patients treated with either pembrolizumab or nivolumab monotherapy based on PD-L1 score. (g) Progression free survival of patients as in f. ns not significant. Error bars indicate s.e.m.
