# Supplementary figures and images for: Tumor hypoxia is associated with resistance to PD-1 blockade in squamous cell carcinoma of the head and neck
Source: PubMed Central journal article supplement — J Immunother Cancer. 2021 May 13;9(5):e002088. doi: 10.1136/jitc-2020-002088 (PMC8126285; doi:10.1136/jitc-2020-002088), 2021-05-13

# Supplemental Figure 1

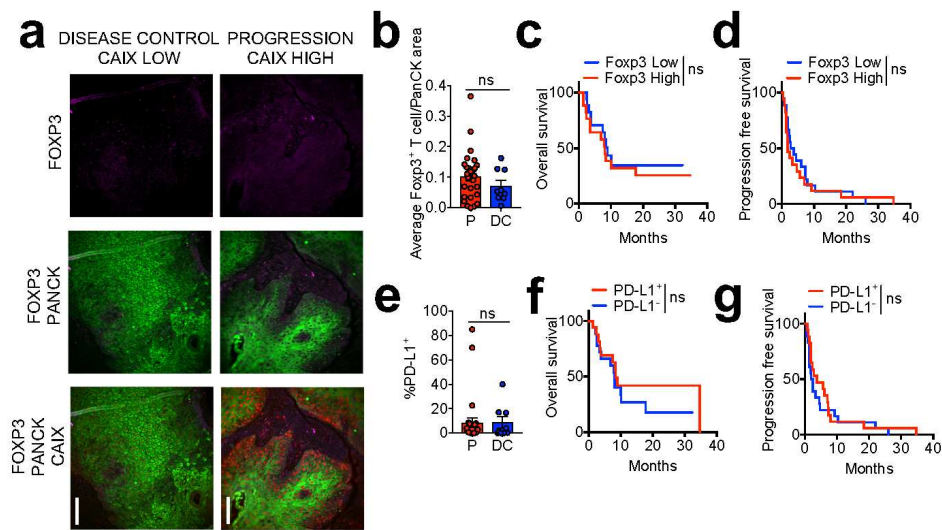

Supplement: jitc-2020-002088supp002.pdf [file jitc-2020-002088supp002.pdf]
